# Supplementary material for: Oral supplementation of healthy adults with 2′-O-fucosyllactose and lacto-N-neotetraose is well tolerated and shifts the intestinal microbiota
Source: PubMed Central journal article supplement (PMC5082288; doi:10.1017/s0007114516003354), 2016-10-10
Supplement: S0007114516003354sup001.pdf [file S0007114516003354sup001.pdf]

Table S1

a)

|                                                    |    | Before |   |       | After  |   |       |
|----------------------------------------------------|----|--------|---|-------|--------|---|-------|
| <b>Blood biochemistry and haematology</b>          |    |        |   |       |        |   |       |
| <b>Alanine transaminase (U/L)</b>                  |    |        |   |       |        |   |       |
| <b>2'FL</b>                                        | 20 | 31.00  | ± | 14.77 | 34.67  | ± | 19.27 |
|                                                    | 10 | 27.00  | ± | 8.96  | 26.50  | ± | 4.60  |
|                                                    | 5  | 25.80  | ± | 12.44 | 26.10  | ± | 8.21  |
| <b>LNnT</b>                                        | 20 | 35.20  | ± | 34.82 | 24.10  | ± | 7.16  |
|                                                    | 10 | 31.60  | ± | 25.44 | 31.00  | ± | 13.61 |
|                                                    | 5  | 28.10  | ± | 14.66 | 30.40  | ± | 7.58  |
| <b>mix</b>                                         | 20 | 28.70  | ± | 10.00 | 30.70  | ± | 15.03 |
|                                                    | 10 | 32.90  | ± | 16.77 | 39.80  | ± | 23.17 |
|                                                    | 5  | 31.30  | ± | 7.83  | 34.70  | ± | 10.89 |
| <b>placebo</b>                                     |    | 28.70  | ± | 14.66 | 27.33  | ± | 7.58  |
| <b>Albumin (g/L)</b>                               |    |        |   |       |        |   |       |
| <b>2'FL</b>                                        | 20 | 40.60  | ± | 1.84  | 41.30  | ± | 2.71  |
|                                                    | 10 | 40.20  | ± | 2.78  | 40.60  | ± | 3.31  |
|                                                    | 5  | 40.67  | ± | 2.40  | 41.50  | ± | 2.51  |
| <b>LNnT</b>                                        | 20 | 40.50  | ± | 2.59  | 41.10  | ± | 3.75  |
|                                                    | 10 | 40.90  | ± | 3.14  | 41.30  | ± | 2.98  |
|                                                    | 5  | 41.80  | ± | 4.44  | 43.20* | ± | 3.58  |
| <b>mix</b>                                         | 20 | 42.20  | ± | 2.04  | 43.10  | ± | 2.85  |
|                                                    | 10 | 39.40  | ± | 4.17  | 40.40  | ± | 3.84  |
|                                                    | 5  | 41.10  | ± | 1.52  | 41.30  | ± | 1.25  |
| <b>placebo</b>                                     |    | 39.80  | ± | 4.44  | 39.80  | ± | 3.58  |
| <b>Alkaline phosphatase (U/L)</b>                  |    |        |   |       |        |   |       |
| <b>2'FL</b>                                        | 20 | 73.70  | ± | 19.37 | 73.90  | ± | 18.91 |
|                                                    | 10 | 60.70  | ± | 11.49 | 61.60  | ± | 12.76 |
|                                                    | 5  | 59.20  | ± | 13.89 | 60.00  | ± | 13.69 |
| <b>LNnT</b>                                        | 20 | 60.90  | ± | 17.48 | 59.70  | ± | 17.63 |
|                                                    | 10 | 70.90  | ± | 19.84 | 70.89  | ± | 23.46 |
|                                                    | 5  | 65.80  | ± | 14.75 | 65.00  | ± | 15.30 |
| <b>mix</b>                                         | 20 | 75.60  | ± | 20.74 | 81.00  | ± | 20.47 |
|                                                    | 10 | 73.30  | ± | 13.93 | 76.00  | ± | 15.43 |
|                                                    | 5  | 71.60  | ± | 27.13 | 72.90  | ± | 26.50 |
| <b>placebo</b>                                     |    | 65.10  | ± | 14.75 | 64.80  | ± | 15.30 |
| <b>Basophilic granulocytes (x10<sup>9</sup>/L)</b> |    |        |   |       |        |   |       |
| <b>2'FL</b>                                        | 20 | 0.05   | ± | 0.02  | 0.05   | ± | 0.01  |
|                                                    | 10 | 0.04   | ± | 0.01  | 0.04   | ± | 0.01  |
|                                                    | 5  | 0.04   | ± | 0.02  | 0.04   | ± | 0.01  |
| <b>LNnT</b>                                        | 20 | 0.04   | ± | 0.02  | 0.04   | ± | 0.02  |
|                                                    | 10 | 0.06   | ± | 0.03  | 0.05   | ± | 0.02  |
|                                                    | 5  | 0.04   | ± | 0.02  | 0.04   | ± | 0.02  |
| <b>mix</b>                                         | 20 | 0.04   | ± | 0.02  | 0.04   | ± | 0.02  |
|                                                    | 10 | 0.06   | ± | 0.03  | 0.06   | ± | 0.04  |
|                                                    | 5  | 0.04   | ± | 0.02  | 0.04   | ± | 0.02  |

|                                            |    |       |   |       |       |   |      |
|--------------------------------------------|----|-------|---|-------|-------|---|------|
| <b>placebo</b>                             |    | 0.04  | ± | 0.02  | 0.04  | ± | 0.02 |
| <b>Bilirubine (µmol/L)</b>                 |    |       |   |       |       |   |      |
| <b>2'FL</b>                                | 20 | 9.70  | ± | 3.71  | 10.70 | ± | 8.11 |
|                                            | 10 | 9.00  | ± | 5.16  | 10.50 | ± | 7.76 |
|                                            | 5  | 9.80  | ± | 2.30  | 10.30 | ± | 3.95 |
| <b>LNnT</b>                                | 20 | 12.00 | ± | 8.38  | 10.60 | ± | 5.25 |
|                                            | 10 | 8.80  | ± | 4.29  | 8.67  | ± | 2.83 |
|                                            | 5  | 12.50 | ± | 13.01 | 14.20 | ± | 6.04 |
| <b>mix</b>                                 | 20 | 9.30  | ± | 2.87  | 9.70  | ± | 2.79 |
|                                            | 10 | 7.80  | ± | 1.99  | 8.90  | ± | 2.81 |
|                                            | 5  | 9.00  | ± | 3.89  | 7.60  | ± | 3.31 |
| <b>placebo</b>                             |    | 13.70 | ± | 13.01 | 10.30 | ± | 6.04 |
| <b>Eosinofilocytes (x10<sup>9</sup>/L)</b> |    |       |   |       |       |   |      |
| <b>2'FL</b>                                | 20 | 0.23  | ± | 0.18  | 0.20* | ± | 0.16 |
|                                            | 10 | 0.16  | ± | 0.11  | 0.16  | ± | 0.10 |
|                                            | 5  | 0.15  | ± | 0.14  | 0.13* | ± | 0.12 |
| <b>LNnT</b>                                | 20 | 0.16  | ± | 0.13  | 0.11  | ± | 0.08 |
|                                            | 10 | 0.22  | ± | 0.15  | 0.21  | ± | 0.11 |
|                                            | 5  | 0.13  | ± | 0.10  | 0.13  | ± | 0.12 |
| <b>mix</b>                                 | 20 | 0.19  | ± | 0.07  | 0.18  | ± | 0.11 |
|                                            | 10 | 0.17  | ± | 0.11  | 0.18  | ± | 0.13 |
|                                            | 5  | 0.27  | ± | 0.20  | 0.24  | ± | 0.13 |
| <b>placebo</b>                             |    | 0.14  | ± | 0.10  | 0.15  | ± | 0.12 |
| <b>Erythrocytes, vol.fr (haematocrit)</b>  |    |       |   |       |       |   |      |
| <b>2'FL</b>                                | 20 | 0.42  | ± | 0.04  | 0.41  | ± | 0.04 |
|                                            | 10 | 0.43  | ± | 0.03  | 0.42  | ± | 0.03 |
|                                            | 5  | 0.43  | ± | 0.02  | 0.43  | ± | 0.03 |
| <b>LNnT</b>                                | 20 | 0.43  | ± | 0.03  | 0.41* | ± | 0.04 |
|                                            | 10 | 0.45  | ± | 0.04  | 0.44  | ± | 0.03 |
|                                            | 5  | 0.43  | ± | 0.04  | 0.43  | ± | 0.04 |
| <b>mix</b>                                 | 20 | 0.42  | ± | 0.04  | 0.42  | ± | 0.04 |
|                                            | 10 | 0.43  | ± | 0.03  | 0.42  | ± | 0.04 |
|                                            | 5  | 0.44  | ± | 0.03  | 0.44  | ± | 0.03 |
| <b>placebo</b>                             |    | 0.44  | ± | 0.04  | 0.43  | ± | 0.04 |
| <b>Erythrocytes (x10<sup>12</sup>/L)</b>   |    |       |   |       |       |   |      |
| <b>2'FL</b>                                | 20 | 4.77  | ± | 0.40  | 4.67  | ± | 0.38 |
|                                            | 10 | 4.78  | ± | 0.43  | 4.72  | ± | 0.41 |
|                                            | 5  | 4.67  | ± | 0.49  | 4.68  | ± | 0.50 |
| <b>LNnT</b>                                | 20 | 4.78  | ± | 0.42  | 4.55  | ± | 0.46 |
|                                            | 10 | 4.93  | ± | 0.49  | 4.87  | ± | 0.52 |
|                                            | 5  | 4.83  | ± | 0.47  | 4.82  | ± | 0.52 |
| <b>mix</b>                                 | 20 | 4.70  | ± | 0.50  | 4.67  | ± | 0.49 |
|                                            | 10 | 4.81  | ± | 0.54  | 4.78  | ± | 0.43 |
|                                            | 5  | 4.89  | ± | 0.52  | 4.87  | ± | 0.54 |
| <b>placebo</b>                             |    | 4.81  | ± | 0.47  | 4.72  | ± | 0.52 |
| <b>Glucose (mmol/L)</b>                    |    |       |   |       |       |   |      |

|                                                     |    |       |   |       |       |   |       |
|-----------------------------------------------------|----|-------|---|-------|-------|---|-------|
| <b>2'FL</b>                                         | 20 | 5.48  | ± | 0.37  | 5.06  | ± | 0.43  |
|                                                     | 10 | 4.96  | ± | 0.24  | 4.77  | ± | 1.04  |
|                                                     | 5  | 4.93  | ± | 0.58  | 5.36* | ± | 0.66  |
| <b>LNnT</b>                                         | 20 | 4.70  | ± | 0.41  | 4.36  | ± | 0.72  |
|                                                     | 10 | 4.60  | ± | 0.70  | 5.11  | ± | 0.83  |
|                                                     | 5  | 5.10  | ± | 0.48  | 4.87  | ± | 0.55  |
| <b>mix</b>                                          | 20 | 4.84  | ± | 0.40  | 4.44  | ± | 1.71  |
|                                                     | 10 | 4.77  | ± | 0.41  | 4.86  | ± | 0.86  |
|                                                     | 5  | 4.79  | ± | 0.59  | 4.85  | ± | 0.53  |
| <b>placebo</b>                                      |    | 4.84  | ± | 0.48  | 4.97  | ± | 0.55  |
| <b>Haemoglobin (mmol/L)</b>                         |    |       |   |       |       |   |       |
| <b>2'FL</b>                                         | 20 | 8.74  | ± | 0.96  | 8.56  | ± | 0.96  |
|                                                     | 10 | 9.03  | ± | 0.88  | 8.77  | ± | 0.79  |
|                                                     | 5  | 8.99  | ± | 0.59  | 8.96  | ± | 0.73  |
| <b>LNnT</b>                                         | 20 | 9.09  | ± | 0.78  | 8.67* | ± | 0.87  |
|                                                     | 10 | 9.28  | ± | 0.96  | 9.21  | ± | 0.74  |
|                                                     | 5  | 9.25  | ± | 0.80  | 9.21  | ± | 0.96  |
| <b>mix</b>                                          | 20 | 8.86  | ± | 0.92  | 8.91  | ± | 0.98  |
|                                                     | 10 | 8.90  | ± | 0.98  | 8.87  | ± | 1.01  |
|                                                     | 5  | 9.10  | ± | 0.51  | 9.12  | ± | 0.61  |
| <b>placebo</b>                                      |    | 9.17  | ± | 0.80  | 9.04  | ± | 0.96  |
| <b>Potassium (mmol/L)</b>                           |    |       |   |       |       |   |       |
| <b>2'FL</b>                                         | 20 | 3.98  | ± | 0.14  | 3.85  | ± | 0.23  |
|                                                     | 10 | 4.08  | ± | 0.28  | 3.94  | ± | 0.20  |
|                                                     | 5  | 3.98  | ± | 0.38  | 3.75  | ± | 0.25  |
| <b>LNnT</b>                                         | 20 | 3.95  | ± | 0.28  | 3.69* | ± | 0.15  |
|                                                     | 10 | 4.01  | ± | 0.17  | 3.90  | ± | 0.25  |
|                                                     | 5  | 4.02  | ± | 0.20  | 3.79* | ± | 0.18  |
| <b>mix</b>                                          | 20 | 4.04  | ± | 0.20  | 3.85* | ± | 0.22  |
|                                                     | 10 | 3.97  | ± | 0.24  | 3.76* | ± | 0.23  |
|                                                     | 5  | 3.94  | ± | 0.26  | 3.88  | ± | 0.33  |
| <b>placebo</b>                                      |    | 3.99  | ± | 0.20  | 3.87* | ± | 0.18  |
| <b>Coagulation factors II+VII+X (%)<sup>§</sup></b> |    |       |   |       |       |   |       |
| <b>2'FL</b>                                         | 20 | 1.01  | ± | 0.25  | 0.99  | ± | 0.25  |
|                                                     | 10 | 0.82  | ± | 0.21  | 0.88  | ± | 0.21  |
|                                                     | 5  | 0.79  | ± | 0.11  | 0.78  | ± | 0.11  |
| <b>LNnT</b>                                         | 20 | 0.88  | ± | 0.18  | 0.91  | ± | 0.18  |
|                                                     | 10 | 0.81  | ± | 0.13  | 0.87  | ± | 0.15  |
|                                                     | 5  | 0.90  | ± | 0.18  | 0.90  | ± | 0.18  |
| <b>mix</b>                                          | 20 | 0.72  | ± | 0.15  | 0.84* | ± | 0.24  |
|                                                     | 10 | 0.88  | ± | 0.15  | 0.82  | ± | 0.31  |
|                                                     | 5  | 0.89  | ± | 0.21  | 0.96  | ± | 0.17  |
| <b>placebo</b>                                      |    | 0.90  | ± | 0.18  | 0.96  | ± | 0.18  |
| <b>Creatinin (µmol/L)</b>                           |    |       |   |       |       |   |       |
| <b>2'FL</b>                                         | 20 | 76.60 | ± | 9.12  | 77.50 | ± | 11.29 |
|                                                     | 10 | 81.20 | ± | 20.79 | 75.60 | ± | 14.28 |

|                                                          |    |       |   |       |       |   |       |
|----------------------------------------------------------|----|-------|---|-------|-------|---|-------|
|                                                          | 5  | 69.80 | ± | 10.94 | 70.40 | ± | 13.76 |
| <b>LNnT</b>                                              | 20 | 72.70 | ± | 12.10 | 73.90 | ± | 13.48 |
|                                                          | 10 | 74.90 | ± | 10.57 | 73.20 | ± | 9.10  |
|                                                          | 5  | 85.90 | ± | 17.12 | 82.80 | ± | 19.18 |
| <b>mix</b>                                               | 20 | 84.20 | ± | 13.68 | 82.60 | ± | 15.59 |
|                                                          | 10 | 74.70 | ± | 16.02 | 76.30 | ± | 17.67 |
|                                                          | 5  | 72.50 | ± | 15.90 | 72.40 | ± | 14.83 |
| <b>placebo</b>                                           |    | 85.50 | ± | 17.12 | 79.40 | ± | 19.18 |
| <b>Leukocytes (x10<sup>9</sup>/L)</b>                    |    |       |   |       |       |   |       |
| <b>2'FL</b>                                              | 20 | 7.99  | ± | 2.67  | 7.16  | ± | 2.63  |
|                                                          | 10 | 6.75  | ± | 1.30  | 6.51  | ± | 1.40  |
|                                                          | 5  | 7.26  | ± | 2.53  | 7.41  | ± | 2.30  |
| <b>LNnT</b>                                              | 20 | 6.94  | ± | 1.68  | 6.23  | ± | 2.11  |
|                                                          | 10 | 7.50  | ± | 3.40  | 6.65  | ± | 2.16  |
|                                                          | 5  | 6.61  | ± | 1.17  | 6.14  | ± | 1.53  |
| <b>mix</b>                                               | 20 | 6.46  | ± | 1.52  | 6.22  | ± | 1.81  |
|                                                          | 10 | 7.04  | ± | 2.54  | 6.99  | ± | 2.23  |
|                                                          | 5  | 6.87  | ± | 1.86  | 6.17* | ± | 1.77  |
| <b>placebo</b>                                           |    | 6.63  | ± | 1.17  | 6.29  | ± | 1.53  |
| <b>Lymphocytes (x10<sup>9</sup>/L)</b>                   |    |       |   |       |       |   |       |
| <b>2'FL</b>                                              | 20 | 2.27  | ± | 0.82  | 2.18  | ± | 0.83  |
|                                                          | 10 | 2.11  | ± | 0.38  | 1.94* | ± | 0.32  |
|                                                          | 5  | 2.19  | ± | 0.54  | 2.09  | ± | 0.44  |
| <b>LNnT</b>                                              | 20 | 2.38  | ± | 0.68  | 2.13  | ± | 0.69  |
|                                                          | 10 | 2.16  | ± | 0.70  | 1.88  | ± | 0.73  |
|                                                          | 5  | 1.96  | ± | 0.44  | 1.98  | ± | 0.52  |
| <b>mix</b>                                               | 20 | 2.27  | ± | 0.62  | 2.04  | ± | 0.57  |
|                                                          | 10 | 2.20  | ± | 0.74  | 2.13  | ± | 0.59  |
|                                                          | 5  | 2.29  | ± | 0.59  | 2.04  | ± | 0.61  |
| <b>placebo</b>                                           |    | 2.05  | ± | 0.44  | 1.93  | ± | 0.52  |
| <b>Metamyelo+Myelo+Promyelocytes (x10<sup>9</sup>/L)</b> |    |       |   |       |       |   |       |
| <b>2'FL</b>                                              | 20 | 0.03  | ± | 0.04  | 0.02  | ± | 0.03  |
|                                                          | 10 | 0.02  | ± | 0.03  | 0.02  | ± | 0.02  |
|                                                          | 5  | 0.02  | ± | 0.04  | 0.03  | ± | 0.03  |
| <b>LNnT</b>                                              | 20 | 0.00  | ± | 0.01  | 0.01  | ± | 0.02  |
|                                                          | 10 | 0.02  | ± | 0.04  | 0.02  | ± | 0.03  |
|                                                          | 5  | 0.01  | ± | 0.01  | 0.01  | ± | 0.01  |
| <b>mix</b>                                               | 20 | 0.00  | ± | 0.00  | 0.01  | ± | 0.01  |
|                                                          | 10 | 0.03  | ± | 0.04  | 0.02  | ± | 0.03  |
|                                                          | 5  | 0.02  | ± | 0.03  | 0.01  | ± | 0.01  |
| <b>placebo</b>                                           |    | 0.00  | ± | 0.01  | 0.01* | ± | 0.01  |
| <b>Monocytes (x10<sup>9</sup>/L)</b>                     |    |       |   |       |       |   |       |
| <b>2'FL</b>                                              | 20 | 0.66  | ± | 0.27  | 0.57  | ± | 0.22  |
|                                                          | 10 | 0.47  | ± | 0.15  | 0.52  | ± | 0.15  |
|                                                          | 5  | 0.55  | ± | 0.17  | 0.52  | ± | 0.17  |
|                                                          | 20 | 0.58  | ± | 0.12  | 0.47* | ± | 0.14  |

|                                                    |    |        |   |       |         |   |        |
|----------------------------------------------------|----|--------|---|-------|---------|---|--------|
| <b>LNnT</b>                                        | 10 | 0.62   | ± | 0.25  | 0.54    | ± | 0.26   |
|                                                    | 5  | 0.59   | ± | 0.20  | 0.51*   | ± | 0.26   |
| <b>mix</b>                                         | 20 | 0.54   | ± | 0.16  | 0.51    | ± | 0.17   |
|                                                    | 10 | 0.60   | ± | 0.19  | 0.53*   | ± | 0.16   |
|                                                    | 5  | 0.55   | ± | 0.13  | 0.47*   | ± | 0.10   |
| <b>placebo</b>                                     |    | 0.54   | ± | 0.20  | 0.56    | ± | 0.26   |
| <b>Sodium (mmol/L)</b>                             |    |        |   |       |         |   |        |
| <b>2'FL</b>                                        | 20 | 139.80 | ± | 1.03  | 139.40  | ± | 0.97   |
|                                                    | 10 | 140.10 | ± | 1.66  | 139.60  | ± | 1.71   |
|                                                    | 5  | 140.40 | ± | 0.97  | 139.00  | ± | 1.49   |
| <b>LNnT</b>                                        | 20 | 140.40 | ± | 0.84  | 140.20  | ± | 0.92   |
|                                                    | 10 | 141.00 | ± | 0.82  | 139.60* | ± | 1.26   |
|                                                    | 5  | 140.30 | ± | 1.93  | 139.40* | ± | 1.34   |
| <b>mix</b>                                         | 20 | 140.00 | ± | 1.15  | 140.00  | ± | 1.33   |
|                                                    | 10 | 139.80 | ± | 1.93  | 139.40  | ± | 1.17   |
|                                                    | 5  | 141.30 | ± | 1.49  | 140.10  | ± | 1.10   |
| <b>placebo</b>                                     |    | 140.20 | ± | 1.93  | 140.70  | ± | 1.34   |
| <b>Neutrophil granulocytes (x10<sup>9</sup>/L)</b> |    |        |   |       |         |   |        |
| <b>2'FL</b>                                        | 20 | 4.72   | ± | 1.59  | 4.16    | ± | 1.72   |
|                                                    | 10 | 3.90   | ± | 1.11  | 3.84    | ± | 1.34   |
|                                                    | 5  | 4.30   | ± | 2.12  | 4.61    | ± | 1.95   |
| <b>LNnT</b>                                        | 20 | 3.75   | ± | 1.13  | 3.45    | ± | 1.56   |
|                                                    | 10 | 4.41   | ± | 2.60  | 3.95    | ± | 1.65   |
|                                                    | 5  | 3.85   | ± | 0.82  | 3.48    | ± | 1.22   |
| <b>mix</b>                                         | 20 | 3.40   | ± | 1.00  | 3.44    | ± | 1.26   |
|                                                    | 10 | 3.98   | ± | 1.73  | 4.05    | ± | 1.91   |
|                                                    | 5  | 3.70   | ± | 1.43  | 3.35    | ± | 1.32   |
| <b>placebo</b>                                     |    | 3.85   | ± | 0.82  | 3.61    | ± | 1.22   |
| <b>Thrombocytes (x10<sup>9</sup>/L)</b>            |    |        |   |       |         |   |        |
| <b>2'FL</b>                                        | 20 | 272.40 | ± | 65.08 | 269.10  | ± | 64.14  |
|                                                    | 10 | 259.80 | ± | 97.38 | 273.30  | ± | 101.61 |
|                                                    | 5  | 246.70 | ± | 56.79 | 247.60  | ± | 40.91  |
| <b>LNnT</b>                                        | 20 | 234.10 | ± | 51.45 | 232.20  | ± | 49.75  |
|                                                    | 10 | 242.90 | ± | 61.90 | 228.30  | ± | 52.40  |
|                                                    | 5  | 238.20 | ± | 74.96 | 246.50  | ± | 63.36  |
| <b>mix</b>                                         | 20 | 231.70 | ± | 28.71 | 237.30  | ± | 22.19  |
|                                                    | 10 | 260.30 | ± | 65.01 | 255.20  | ± | 45.89  |
|                                                    | 5  | 249.70 | ± | 36.70 | 266.10  | ± | 49.03  |
| <b>placebo</b>                                     |    | 235.20 | ± | 74.96 | 242.00  | ± | 63.36  |

<sup>§</sup> Coagulation factors are arbitrarily set at 100%

- b)** In many cases CRP were not given as a specific value. This was the case if CRP was <2.9. Hence a total mean of all subjects cannot be calculated. CRP is therefore indicated as normal or without normal ranges.

---

**C-reactive protein (CRP; mg/L)**

---

|                |    | <u>normal</u> | <u>elevated</u> | <u>normal</u> | <u>elevated</u> |
|----------------|----|---------------|-----------------|---------------|-----------------|
| <b>2'FL</b>    | 20 | 9             | 1               | 10            | 0               |
|                | 10 | 10            | 0               | 9             | 1               |
|                | 5  | 10            | 0               | 8             | 1               |
| <b>LNnT</b>    | 20 | 9             | 1               | 10            | 0               |
|                | 10 | 10            | 0               | 9             | 0               |
|                | 5  | 10            | 0               | 10            | 0               |
| <b>mix</b>     | 20 | 10            | 0               | 10            | 0               |
|                | 10 | 7             | 3               | 10            | 0               |
|                | 5  | 10            | 0               | 10            | 0               |
| <b>placebo</b> |    | 9             | 1               | 9             | 1               |

Frequency of normal (CRP<8.0) and elevated CRP (CRP ≥ 8) before and after supplementation.

- c) In many cases GFR were not given as a specific value. This was the case if GFR was > 90. Hence a total mean of all subjects cannot be calculated. GFR is therefore indicated as normal or without normal ranges.

| <b>Glomerular filtration rate (GFR; mL/min/1.73m<sup>2</sup>)</b> |    |               |                 |               |                 |
|-------------------------------------------------------------------|----|---------------|-----------------|---------------|-----------------|
|                                                                   |    | <u>normal</u> | <u>impaired</u> | <u>normal</u> | <u>impaired</u> |
| <b>2'FL</b>                                                       | 20 | 10            | 0               | 9             | 1               |
|                                                                   | 10 | 10            | 0               | 10            | 0               |
|                                                                   | 5  | 10            | 0               | 9             | 1               |
| <b>LNnT</b>                                                       | 20 | 10            | 0               | 10            | 0               |
|                                                                   | 10 | 10            | 0               | 10            | 0               |
|                                                                   | 5  | 10            | 0               | 10            | 0               |
| <b>mix</b>                                                        | 20 | 9             | 1               | 9             | 1               |
|                                                                   | 10 | 10            | 0               | 10            | 0               |
|                                                                   | 5  | 10            | 0               | 10            | 0               |
| <b>placebo</b>                                                    |    | 10            | 0               | 10            | 0               |

Frequency of normal (GFR ≥ 60) and impaired GFR (GFR<60) before and after supplementation.

- d)

| <b>Blood biomarkers</b>        |    |      |   |      |      |   |      |
|--------------------------------|----|------|---|------|------|---|------|
| <b>Apolipoprotein A1 (g/L)</b> |    |      |   |      |      |   |      |
| <b>2'FL</b>                    | 20 | 1.69 | ± | 0.38 | 1.61 | ± | 0.35 |
|                                | 10 | 1.55 | ± | 0.29 | 1.60 | ± | 0.34 |
|                                | 5  | 1.67 | ± | 0.25 | 1.55 | ± | 0.27 |
| <b>LNnT</b>                    | 20 | 1.71 | ± | 0.28 | 1.58 | ± | 0.27 |
|                                | 10 | 1.53 | ± | 0.23 | 1.56 | ± | 0.22 |
|                                | 5  | 1.58 | ± | 0.21 | 1.60 | ± | 0.20 |
| <b>mix</b>                     | 20 | 1.57 | ± | 0.32 | 1.53 | ± | 0.27 |
|                                | 10 | 1.62 | ± | 0.26 | 1.50 | ± | 0.29 |
|                                | 5  | 1.59 | ± | 0.24 | 1.69 | ± | 0.23 |
| <b>placebo</b>                 |    | 1.68 | ± | 0.34 | 1.67 | ± | 0.32 |

| <b>Apolipoprotein B (g/L)</b>     |    |        |   |        |        |   |        |
|-----------------------------------|----|--------|---|--------|--------|---|--------|
| <b>2'FL</b>                       | 20 | 1.03   | ± | 0.28   | 0.98   | ± | 0.21   |
|                                   | 10 | 0.77   | ± | 0.17   | 0.75   | ± | 0.19   |
|                                   | 5  | 0.88   | ± | 0.20   | 0.80   | ± | 0.19   |
| <b>LNnT</b>                       | 20 | 0.82   | ± | 0.26   | 0.77   | ± | 0.23   |
|                                   | 10 | 0.80   | ± | 0.24   | 0.82   | ± | 0.21   |
|                                   | 5  | 0.85   | ± | 0.19   | 0.87   | ± | 0.18   |
| <b>mix</b>                        | 20 | 0.68   | ± | 0.22   | 0.69   | ± | 0.13   |
|                                   | 10 | 0.97   | ± | 0.25   | 0.98   | ± | 0.33   |
|                                   | 5  | 0.78   | ± | 0.27   | 0.84   | ± | 0.28   |
| <b>placebo</b>                    |    | 0.75   | ± | 0.12   | 0.77   | ± | 0.13   |
| <b>Chol+ester in LDL (mmol/L)</b> |    |        |   |        |        |   |        |
| <b>2'FL</b>                       | 20 | 3.71   | ± | 1.00   | 3.52   | ± | 0.81   |
|                                   | 10 | 2.59   | ± | 0.74   | 2.58   | ± | 0.70   |
|                                   | 5  | 3.11   | ± | 0.86   | 2.86   | ± | 0.84   |
| <b>LNnT</b>                       | 20 | 2.79   | ± | 1.06   | 2.81   | ± | 0.94   |
|                                   | 10 | 2.71   | ± | 0.96   | 2.85   | ± | 0.92   |
|                                   | 5  | 2.95   | ± | 0.64   | 3.04   | ± | 0.70   |
| <b>mix</b>                        | 20 | 2.22   | ± | 0.88   | 2.25   | ± | 0.58   |
|                                   | 10 | 3.23   | ± | 0.87   | 3.45   | ± | 1.13   |
|                                   | 5  | 2.63   | ± | 1.01   | 2.93*  | ± | 1.08   |
| <b>placebo</b>                    |    | 2.45   | ± | 0.60   | 2.64   | ± | 0.60   |
| <b>Chol+ester in HDL (mmol/L)</b> |    |        |   |        |        |   |        |
| <b>2'FL</b>                       | 20 | 1.42   | ± | 0.44   | 1.36   | ± | 0.38   |
|                                   | 10 | 1.46   | ± | 0.42   | 1.49   | ± | 0.45   |
|                                   | 5  | 1.51   | ± | 0.39   | 1.41   | ± | 0.41   |
| <b>LNnT</b>                       | 20 | 1.46   | ± | 0.25   | 1.42   | ± | 0.30   |
|                                   | 10 | 1.35   | ± | 0.28   | 1.33   | ± | 0.25   |
|                                   | 5  | 1.37   | ± | 0.23   | 1.39   | ± | 0.29   |
| <b>mix</b>                        | 20 | 1.43   | ± | 0.48   | 1.42   | ± | 0.43   |
|                                   | 10 | 1.45   | ± | 0.34   | 1.30*  | ± | 0.33   |
|                                   | 5  | 1.39   | ± | 0.28   | 1.43   | ± | 0.26   |
| <b>placebo</b>                    |    | 1.46   | ± | 0.43   | 1.49   | ± | 0.42   |
| <b>Cortisol (Total) (µmol/L)</b>  |    |        |   |        |        |   |        |
| <b>2'FL</b>                       | 20 | 230.90 | ± | 50.37  | 261.40 | ± | 124.27 |
|                                   | 10 | 241.30 | ± | 72.67  | 283.60 | ± | 116.01 |
|                                   | 5  | 254.00 | ± | 110.87 | 258.10 | ± | 49.63  |
| <b>LNnT</b>                       | 20 | 254.00 | ± | 139.54 | 271.50 | ± | 150.30 |
|                                   | 10 | 311.40 | ± | 125.84 | 345.80 | ± | 111.93 |
|                                   | 5  | 270.40 | ± | 56.47  | 273.30 | ± | 48.95  |
| <b>mix</b>                        | 20 | 290.70 | ± | 90.36  | 280.80 | ± | 65.21  |
|                                   | 10 | 292.00 | ± | 138.82 | 260.60 | ± | 125.58 |
|                                   | 5  | 253.00 | ± | 125.02 | 263.30 | ± | 56.72  |
| <b>placebo</b>                    |    | 317.20 | ± | 166.39 | 287.00 | ± | 155.16 |
| <b>Estradiol (nmol/L)</b>         |    |        |   |        |        |   |        |
|                                   | 20 | 0.22   | ± | 0.09   | 0.36   | ± | 0.35   |

|                                  |    |        |   |        |         |   |       |
|----------------------------------|----|--------|---|--------|---------|---|-------|
| <b>2'FL</b>                      | 10 | 0.21   | ± | 0.13   | 0.43    | ± | 0.41  |
|                                  | 5  | 0.30   | ± | 0.24   | 0.38    | ± | 0.57  |
| <b>LNnT</b>                      | 20 | 0.26   | ± | 0.19   | 0.25    | ± | 0.17  |
|                                  | 10 | 0.23   | ± | 0.06   | 0.42*   | ± | 0.40  |
|                                  | 5  | 0.21   | ± | 0.12   | 0.15    | ± | 0.04  |
| <b>mix</b>                       | 20 | 0.16   | ± | 0.06   | 0.16    | ± | 0.05  |
|                                  | 10 | 0.22   | ± | 0.08   | 0.32    | ± | 0.32  |
|                                  | 5  | 0.28   | ± | 0.33   | 0.16    | ± | 0.09  |
| <b>placebo</b>                   |    | 0.32   | ± | 0.28   | 0.18    | ± | 0.06  |
| <b>FFA(C6-C20) (nmol/L)</b>      |    |        |   |        |         |   |       |
| <b>2'FL</b>                      | 20 | 0.34   | ± | 0.24   | 0.35    | ± | 0.14  |
|                                  | 10 | 0.30   | ± | 0.16   | 0.30    | ± | 0.19  |
|                                  | 5  | 0.35   | ± | 0.23   | 0.32    | ± | 0.17  |
| <b>LNnT</b>                      | 20 | 0.34   | ± | 0.20   | 0.29    | ± | 0.29  |
|                                  | 10 | 0.33   | ± | 0.24   | 0.35    | ± | 0.17  |
|                                  | 5  | 0.19   | ± | 0.10   | 0.30    | ± | 0.14  |
| <b>mix</b>                       | 20 | 0.22   | ± | 0.17   | 0.20    | ± | 0.13  |
|                                  | 10 | 0.32   | ± | 0.25   | 0.30    | ± | 0.28  |
|                                  | 5  | 0.32   | ± | 0.22   | 0.33    | ± | 0.18  |
| <b>placebo</b>                   |    | 0.29   | ± | 0.25   | 0.28    | ± | 0.18  |
| <b>Glucagon (ng/L)</b>           |    |        |   |        |         |   |       |
| <b>2'FL</b>                      | 20 | 119.40 | ± | 82.59  | 144.00  | ± | 80.39 |
|                                  | 10 | 113.60 | ± | 65.93  | 147.70* | ± | 68.84 |
|                                  | 5  | 90.10  | ± | 63.89  | 141.90* | ± | 55.71 |
| <b>LNnT</b>                      | 20 | 110.50 | ± | 67.13  | 141.50  | ± | 52.23 |
|                                  | 10 | 114.20 | ± | 60.86  | 139.50  | ± | 61.58 |
|                                  | 5  | 110.80 | ± | 75.59  | 133.00  | ± | 72.04 |
| <b>mix</b>                       | 20 | 126.60 | ± | 72.21  | 145.60  | ± | 58.87 |
|                                  | 10 | 124.70 | ± | 68.66  | 148.10  | ± | 63.59 |
|                                  | 5  | 114.10 | ± | 54.35  | 138.00  | ± | 54.09 |
| <b>placebo</b>                   |    | 115.90 | ± | 70.16  | 156.00* | ± | 67.98 |
| <b>Hemoglobin A1c (mmol/mol)</b> |    |        |   |        |         |   |       |
| <b>2'FL</b>                      | 20 | 34.50  | ± | 3.17   | 34.30   | ± | 3.16  |
|                                  | 10 | 32.40  | ± | 2.55   | 31.78   | ± | 2.39  |
|                                  | 5  | 33.80  | ± | 2.44   | 33.10*  | ± | 2.47  |
| <b>LNnT</b>                      | 20 | 30.40  | ± | 1.96   | 30.00   | ± | 1.83  |
|                                  | 10 | 33.70  | ± | 2.11   | 32.70*  | ± | 2.45  |
|                                  | 5  | 32.70  | ± | 2.45   | 32.90   | ± | 2.69  |
| <b>mix</b>                       | 20 | 32.80  | ± | 3.79   | 32.60   | ± | 3.98  |
|                                  | 10 | 34.40  | ± | 3.60   | 34.70   | ± | 4.00  |
|                                  | 5  | 34.30  | ± | 3.37   | 33.50*  | ± | 3.41  |
| <b>placebo</b>                   |    | 31.20  | ± | 2.15   | 30.80   | ± | 2.20  |
| <b>Insulin (nmol/L)</b>          |    |        |   |        |         |   |       |
| <b>2'FL</b>                      | 20 | 88.90  | ± | 168.91 | 107.38  | ± | 80.97 |
|                                  | 10 | 44.44  | ± | 26.72  | 40.60   | ± | 29.08 |
|                                  | 5  | 70.50  | ± | 36.98  | 102.00  | ± | 94.42 |

|                                    |    |         |   |        |         |   |        |
|------------------------------------|----|---------|---|--------|---------|---|--------|
| <b>LNnT</b>                        | 20 | 76.56   | ± | 71.64  | 57.44   | ± | 36.94  |
|                                    | 10 | 111.30  | ± | 101.07 | 96.40   | ± | 81.14  |
|                                    | 5  | 49.60   | ± | 34.27  | 67.40   | ± | 46.76  |
| <b>mix</b>                         | 20 | 89.00   | ± | 69.52  | 89.22   | ± | 54.52  |
|                                    | 10 | 147.80  | ± | 140.22 | 75.11*  | ± | 50.51  |
|                                    | 5  | 81.20   | ± | 69.20  | 66.22   | ± | 39.45  |
| <b>placebo</b>                     |    | 60.00   | ± | 44.98  | 84.30   | ± | 62.33  |
| <b>Iron (µmol/L)</b>               |    |         |   |        |         |   |        |
| <b>2'FL</b>                        | 20 | 18.78   | ± | 9.64   | 16.78   | ± | 9.61   |
|                                    | 10 | 15.10   | ± | 6.40   | 14.00   | ± | 6.62   |
|                                    | 5  | 18.50   | ± | 5.44   | 14.50   | ± | 5.06   |
| <b>LNnT</b>                        | 20 | 13.80   | ± | 4.34   | 11.60   | ± | 3.57   |
|                                    | 10 | 18.50   | ± | 6.24   | 21.50   | ± | 5.30   |
|                                    | 5  | 18.30   | ± | 3.23   | 18.90   | ± | 5.97   |
| <b>mix</b>                         | 20 | 19.40   | ± | 5.21   | 16.00   | ± | 4.81   |
|                                    | 10 | 14.50   | ± | 7.18   | 16.80   | ± | 6.51   |
|                                    | 5  | 18.90   | ± | 3.48   | 16.30   | ± | 4.14   |
| <b>placebo</b>                     |    | 16.90   | ± | 8.62   | 16.00   | ± | 7.62   |
| <b>Lysozyme (nmol/L)</b>           |    |         |   |        |         |   |        |
| <b>2'FL</b>                        | 20 | 1000.20 | ± | 506.16 | 1108.67 | ± | 403.04 |
|                                    | 10 | 686.30  | ± | 132.35 | 872.20* | ± | 239.10 |
|                                    | 5  | 747.30  | ± | 181.84 | 982.00* | ± | 318.67 |
| <b>LNnT</b>                        | 20 | 708.60  | ± | 247.86 | 694.00  | ± | 201.56 |
|                                    | 10 | 895.00  | ± | 175.20 | 1034.20 | ± | 325.54 |
|                                    | 5  | 851.30  | ± | 93.60  | 953.80  | ± | 164.74 |
| <b>mix</b>                         | 20 | 857.20  | ± | 251.18 | 920.60  | ± | 351.51 |
|                                    | 10 | 828.10  | ± | 365.53 | 970.67  | ± | 240.95 |
|                                    | 5  | 832.90  | ± | 221.62 | 803.80  | ± | 217.57 |
| <b>placebo</b>                     |    | 854.20  | ± | 185.05 | 946.11  | ± | 216.50 |
| <b>Progesterone (nmol/L)</b>       |    |         |   |        |         |   |        |
| <b>2'FL</b>                        | 20 | 3.37    | ± | 4.72   | 4.42    | ± | 4.99   |
|                                    | 10 | 4.01    | ± | 5.78   | 3.26    | ± | 4.34   |
|                                    | 5  | 8.45    | ± | 16.52  | 4.67    | ± | 5.60   |
| <b>LNnT</b>                        | 20 | 7.18    | ± | 13.47  | 7.22    | ± | 9.75   |
|                                    | 10 | 1.56    | ± | 0.95   | 4.75    | ± | 6.49   |
|                                    | 5  | 5.21    | ± | 11.64  | 1.04    | ± | 0.27   |
| <b>mix</b>                         | 20 | 0.93    | ± | 0.21   | 1.16    | ± | 0.46   |
|                                    | 10 | 1.70    | ± | 0.71   | 1.42    | ± | 0.68   |
|                                    | 5  | 4.27    | ± | 8.26   | 1.37    | ± | 0.46   |
| <b>placebo</b>                     |    | 14.38   | ± | 19.37  | 0.97    | ± | 0.38   |
| <b>Total testosterone (nmol/L)</b> |    |         |   |        |         |   |        |
| <b>2'FL</b>                        | 20 | 11.45   | ± | 13.64  | 7.68*   | ± | 11.32  |
|                                    | 10 | 10.81   | ± | 15.42  | 9.78    | ± | 12.73  |
|                                    | 5  | 6.52    | ± | 7.97   | 6.48    | ± | 8.56   |
| <b>LNnT</b>                        | 20 | 11.05   | ± | 13.44  | 9.55    | ± | 11.33  |
|                                    | 10 | 9.50    | ± | 11.88  | 9.88    | ± | 12.03  |

|                                           |    |       |   |      |        |   |       |
|-------------------------------------------|----|-------|---|------|--------|---|-------|
|                                           | 5  | 18.35 | ± | 9.42 | 15.86* | ± | 7.49  |
| <b>mix</b>                                | 20 | 16.40 | ± | 8.95 | 14.79  | ± | 8.48  |
|                                           | 10 | 6.15  | ± | 7.65 | 6.94   | ± | 8.30  |
|                                           | 5  | 10.07 | ± | 9.27 | 12.08  | ± | 10.25 |
| <b>placebo</b>                            |    | 6.44  | ± | 9.83 | 5.18   | ± | 7.30  |
| <b>Transferrin (g/L)</b>                  |    |       |   |      |        |   |       |
| <b>2'FL</b>                               | 20 | 2.71  | ± | 0.70 | 2.70   | ± | 0.66  |
|                                           | 10 | 2.27  | ± | 0.56 | 2.38   | ± | 0.65  |
|                                           | 5  | 2.55  | ± | 0.28 | 2.44   | ± | 0.39  |
| <b>LNnT</b>                               | 20 | 2.52  | ± | 0.49 | 2.50   | ± | 0.66  |
|                                           | 10 | 2.43  | ± | 0.29 | 2.44   | ± | 0.24  |
|                                           | 5  | 2.42  | ± | 0.30 | 2.47   | ± | 0.31  |
| <b>mix</b>                                | 20 | 2.37  | ± | 0.37 | 2.38   | ± | 0.22  |
|                                           | 10 | 2.64  | ± | 0.25 | 2.64   | ± | 0.43  |
|                                           | 5  | 2.46  | ± | 0.42 | 2.62   | ± | 0.46  |
| <b>placebo</b>                            |    | 2.56  | ± | 0.52 | 2.66   | ± | 0.48  |
| <b>Triglyceride (mmol/L)</b>              |    |       |   |      |        |   |       |
| <b>2'FL</b>                               | 20 | 2.50  | ± | 2.74 | 2.21   | ± | 2.14  |
|                                           | 10 | 1.20  | ± | 0.80 | 1.08   | ± | 0.81  |
|                                           | 5  | 1.53  | ± | 1.09 | 1.13   | ± | 0.41  |
| <b>LNnT</b>                               | 20 | 1.26  | ± | 0.74 | 1.11   | ± | 0.66  |
|                                           | 10 | 1.34  | ± | 0.91 | 1.27   | ± | 0.55  |
|                                           | 5  | 1.35  | ± | 0.78 | 1.56   | ± | 0.84  |
| <b>mix</b>                                | 20 | 1.05  | ± | 0.45 | 1.13   | ± | 0.72  |
|                                           | 10 | 2.09  | ± | 1.60 | 2.11   | ± | 1.43  |
|                                           | 5  | 1.37  | ± | 1.05 | 1.61   | ± | 0.68  |
| <b>placebo</b>                            |    | 0.96  | ± | 0.45 | 1.33   | ± | 0.94  |
| <b>Blood Urea Nitrogen (BUN) (mmol/L)</b> |    |       |   |      |        |   |       |
| <b>2'FL</b>                               | 20 | 5.44  | ± | 1.63 | 5.39   | ± | 0.78  |
|                                           | 10 | 5.12  | ± | 1.16 | 5.04   | ± | 1.13  |
|                                           | 5  | 4.66  | ± | 0.86 | 4.47   | ± | 1.20  |
| <b>LNnT</b>                               | 20 | 5.19  | ± | 1.47 | 5.01   | ± | 1.50  |
|                                           | 10 | 4.36  | ± | 1.09 | 4.62   | ± | 0.67  |
|                                           | 5  | 5.69  | ± | 1.17 | 5.67   | ± | 1.19  |
| <b>mix</b>                                | 20 | 5.34  | ± | 0.89 | 5.56   | ± | 0.98  |
|                                           | 10 | 5.09  | ± | 1.31 | 5.07   | ± | 1.16  |
|                                           | 5  | 5.29  | ± | 1.19 | 5.04   | ± | 1.12  |
| <b>placebo</b>                            |    | 4.63  | ± | 1.08 | 4.92   | ± | 2.17  |

- e) In many cases the cytokines were not given as a specific value due to levels below the method detection limit. Hence a total mean of all subjects cannot be calculated. The cytokines are therefore indicated as normal or without normal ranges.

| <b>Interleukin-10 (pg/mL)</b> |    |               |                 |               |                 |
|-------------------------------|----|---------------|-----------------|---------------|-----------------|
|                               |    | <u>normal</u> | <u>elevated</u> | <u>normal</u> | <u>elevated</u> |
| <b>2'FL</b>                   | 20 | 10            | 0               | 10            | 0               |
|                               | 10 | 10            | 0               | 10            | 0               |

|                |    |    |   |    |   |
|----------------|----|----|---|----|---|
|                | 5  | 10 | 0 | 10 | 0 |
| <b>LNnT</b>    | 20 | 10 | 0 | 10 | 0 |
|                | 10 | 8  | 2 | 9  | 1 |
|                | 5  | 8  | 2 | 8  | 2 |
| <b>mix</b>     | 20 | 10 | 0 | 10 | 0 |
|                | 10 | 9  | 1 | 9  | 1 |
|                | 5  | 8  | 2 | 8  | 2 |
| <b>placebo</b> |    | 10 | 0 | 10 | 0 |

Method detection limit: <5 pg/mL

Normal range (0-9.1 pg/mL) and elevated (>9.1 pg/mL) before and after supplementation.

| <b>Interleukin-6 (pg/mL)</b> |    |               |                 |               |                 |
|------------------------------|----|---------------|-----------------|---------------|-----------------|
|                              |    | <u>normal</u> | <u>elevated</u> | <u>normal</u> | <u>elevated</u> |
| <b>2'FL</b>                  | 20 | 10            | 0               | 10            | 0               |
|                              | 10 | 10            | 0               | 10            | 0               |
|                              | 5  | 10            | 0               | 10            | 0               |
| <b>LNnT</b>                  | 20 | 10            | 0               | 10            | 0               |
|                              | 10 | 10            | 0               | 10            | 0               |
|                              | 5  | 10            | 0               | 10            | 0               |
| <b>mix</b>                   | 20 | 10            | 0               | 10            | 0               |
|                              | 10 | 10            | 0               | 10            | 0               |
|                              | 5  | 10            | 0               | 10            | 0               |
| <b>placebo</b>               |    | 9             | 1               | 10            | 0               |

Method detection limit: <2 pg/mL

Normal range (0-5.9 pg/mL) and elevated (>5.9 pg/mL) before and

| <b>TNF-alfa (pg/mL)</b> |    |               |                 |               |                 |
|-------------------------|----|---------------|-----------------|---------------|-----------------|
|                         |    | <u>normal</u> | <u>elevated</u> | <u>normal</u> | <u>elevated</u> |
| <b>2'FL</b>             | 20 | 10            | 0               | 10            | 0               |
|                         | 10 | 10            | 0               | 10            | 0               |
|                         | 5  | 10            | 0               | 10            | 0               |
| <b>LNnT</b>             | 20 | 10            | 0               | 10            | 0               |
|                         | 10 | 10            | 0               | 10            | 0               |
|                         | 5  | 10            | 0               | 10            | 0               |
| <b>mix</b>              | 20 | 10            | 0               | 10            | 0               |
|                         | 10 | 10            | 0               | 10            | 0               |
|                         | 5  | 10            | 0               | 10            | 0               |
| <b>placebo</b>          |    | 10            | 0               | 10            | 0               |

Method detection limit: <15.6 pg/mL

Normal range (0-15.6 pg/mL) and elevated (>15.6 pg/mL) before

f)

| <b>Faecal biomarkers</b>   |    |       |   |       |       |   |       |
|----------------------------|----|-------|---|-------|-------|---|-------|
| <b>Calprotectin (µg/g)</b> |    |       |   |       |       |   |       |
| <b>2'FL</b>                | 20 | 46.42 | ± | 32.41 | 39.67 | ± | 55.42 |
|                            | 10 | 36.98 | ± | 22.52 | 40.78 | ± | 56.57 |
|                            | 5  | 66.18 | ± | 99.80 | 26.52 | ± | 23.75 |
|                            | 20 | 49.32 | ± | 42.11 | 24.24 | ± | 23.38 |

|                    |    |         |   |         |         |   |         |
|--------------------|----|---------|---|---------|---------|---|---------|
| <b>LNnT</b>        | 10 | 27.94   | ± | 22.89   | 35.34   | ± | 34.54   |
|                    | 5  | 31.95   | ± | 38.09   | 24.94   | ± | 15.28   |
| <b>mix</b>         | 20 | 51.43   | ± | 58.78   | 50.91   | ± | 76.26   |
|                    | 10 | 27.57   | ± | 22.88   | 23.72   | ± | 15.92   |
|                    | 5  | 49.82   | ± | 53.93   | 32.22   | ± | 14.62   |
| <b>placebo</b>     |    | 20.17   | ± | 11.33   | 41.19   | ± | 40.23   |
| <b>IgA (µg/mL)</b> |    |         |   |         |         |   |         |
| <b>2'FL</b>        | 20 | 967.37  | ± | 932.09  | 739.71  | ± | 844.39  |
|                    | 10 | 1076.32 | ± | 1007.04 | 1240.98 | ± | 1252.26 |
|                    | 5  | 1467.84 | ± | 1275.02 | 938.38  | ± | 720.12  |
| <b>LNnT</b>        | 20 | 1966.20 | ± | 1714.82 | 707.65* | ± | 498.63  |
|                    | 10 | 1641.80 | ± | 848.33  | 1042.50 | ± | 977.89  |
|                    | 5  | 649.01  | ± | 675.64  | 1203.45 | ± | 718.90  |
| <b>mix</b>         | 20 | 730.73  | ± | 647.20  | 1427.27 | ± | 1651.86 |
|                    | 10 | 606.29  | ± | 475.67  | 815.38  | ± | 722.32  |
|                    | 5  | 1099.97 | ± | 736.93  | 1391.97 | ± | 1319.12 |
| <b>placebo</b>     |    | 784.05  | ± | 728.34  | 519.33  | ± | 393.79  |

Values are mean±SD of blood safety and faecal biomarker concentration measured at entry and end of the intervention.

\*indicates significant difference in concentration measured at entry and end of intervention for each individual group determined using Wilcoxon signed-rank test (p<0.05).
